# Supplementary material
Source: PubMed Central journal article supplement (PMC9074889)
Supplement: NIHMS1801714-supplement-Supplemental_Digital_Content.pdf [file NIHMS1801714-supplement-Supplemental_Digital_Content.pdf]

## TAP-blockade Technique

*TAP pre-injection*

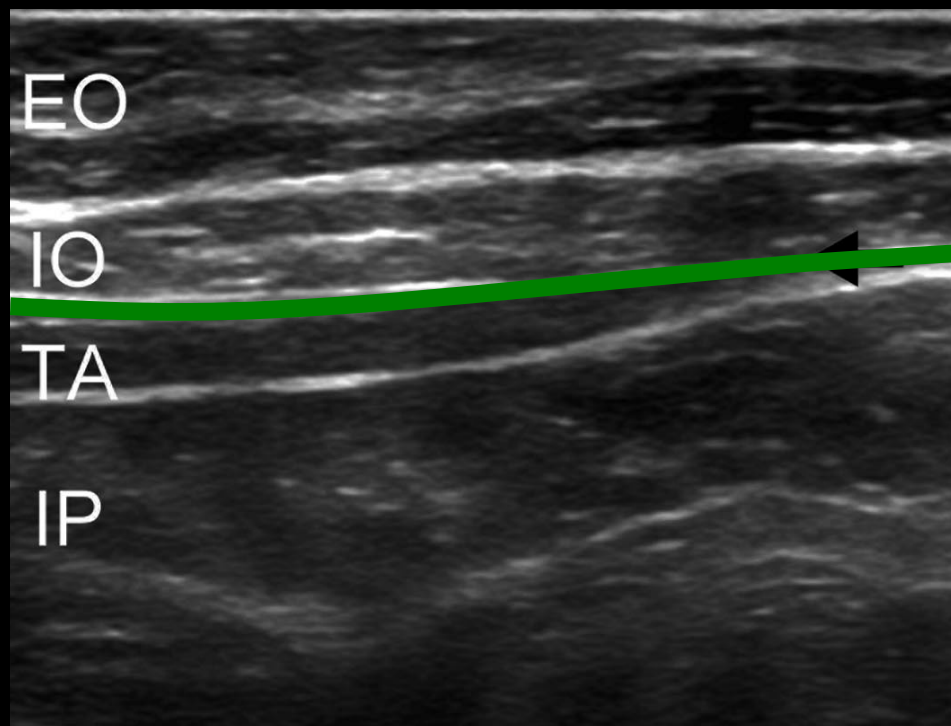

*TAP post-injection*

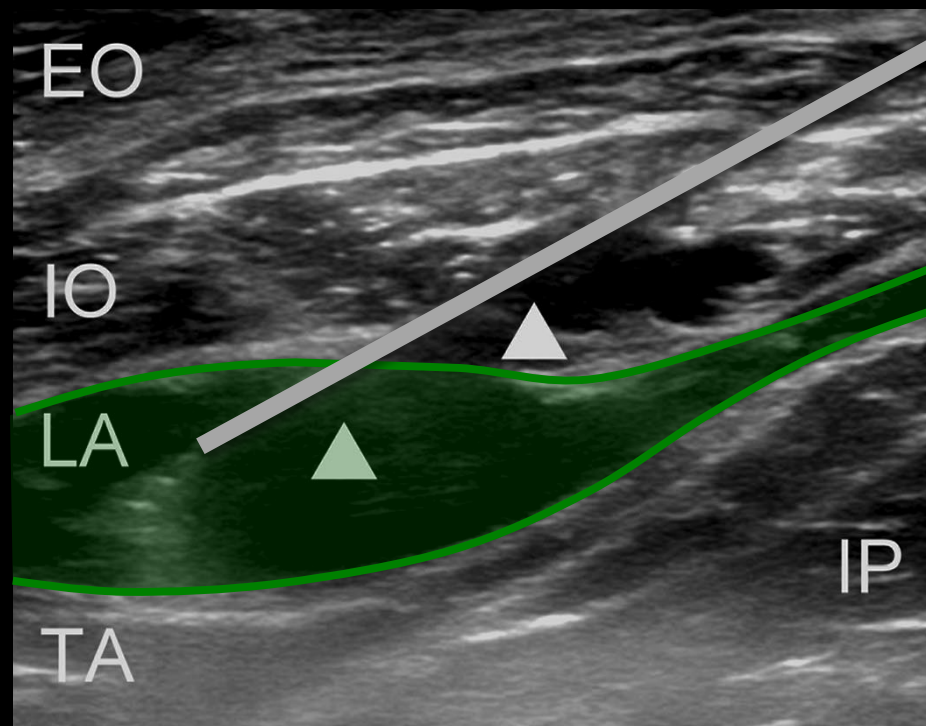

EO = External Oblique

IO = Internal Oblique

TA = Transversus Abdominis

IP = Intrapерitoneal

LA = Local Anesthetic

▲ = arrowheads point to injection needle
